# Supplementary material
Source: ML conference proceedings conference paper supplement (https://proceedings.neurips.cc/paper_files/paper/2008/hash/647bba344396e7c8170902bcf2e15551-Abstract.html)

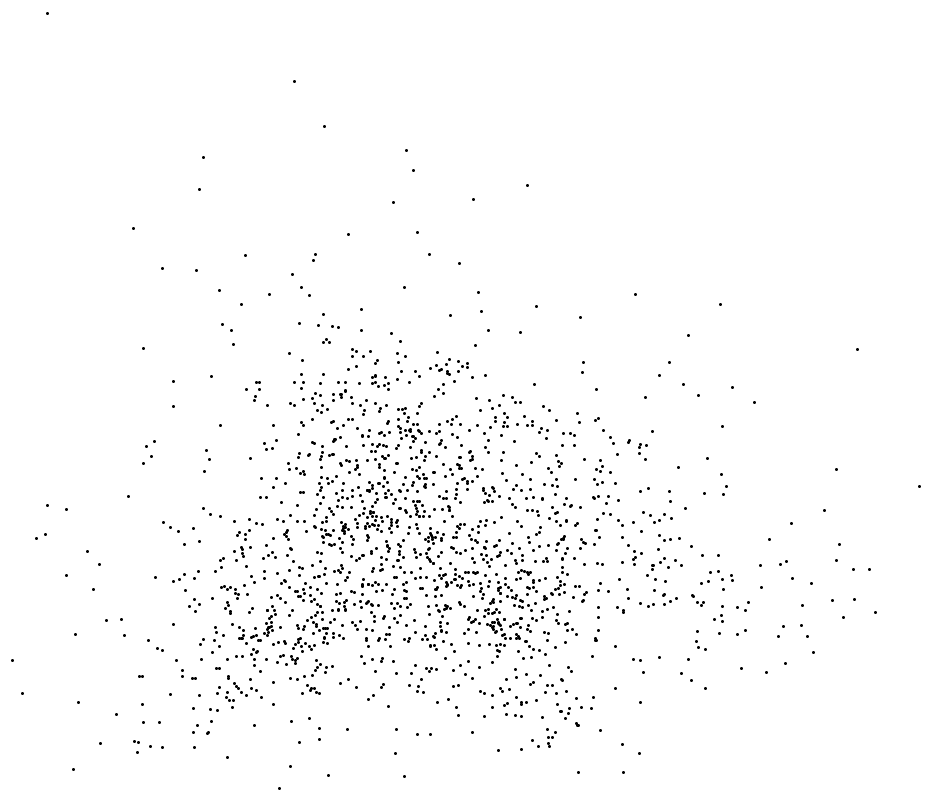

Supplement: Supplementary file [file 647bba344396e7c8170902bcf2e15551-Supplemental.zip]
